# Supplementary material
Source: Elsevier journal article supplement (https://comptes-rendus.academie-sciences.fr/chimie/article/10.1016/j.crci.2012.12.002/file/attach/mmc1.pdf)
Supplement: mmc1 [file mmc1.pdf]

# **Rational design of Lanthanide Binding Peptides**

## **Elaboration rationnelle de ligands peptidiques des ions lanthanides.**

Laetitia Ancel, Agnieszka Niedźwiecka, Colette Lebrun, Christelle Gateau, Pascale

Delangle\*

Service de Chimie Inorganique et Biologique (UMR E\_3 CEA, UJF)

INAC

Commissariat à l'Énergie Atomique

17 rue des martyrs

38054 Grenoble cedex

tel: +33 4 38 78 98 22, fax: +33 4 38 78 50 90

email: Pascale.delangle@cea.fr

## **Supplementary Material**

## Synthesis and characterization of P<sup>HD'</sup>.

---

The synthesis of PHD' was performed as previously reported in references<sup>[1-3]</sup>.

**P<sup>HD'</sup>**: Ac-Ser-Ed3a<sub>2</sub>-Gly-Trp- Ada<sub>2</sub>-Ala-NH<sub>2</sub>

Yield of the on-resin synthesis (UV): 83%, Isolated mass: 19.8 mg (isolated yield assuming that the solid is **P<sup>HD'</sup>**·3TFA: 26.3%).

ES<sup>+</sup>-MS (AcONH<sub>4</sub>, pH 7.0):  $m/z = 994.4$  [M+H]<sup>+</sup>

ES<sup>-</sup>-MS (AcONH<sub>4</sub>, pH 7):  $m/z = 992.3$  [M-H]<sup>-</sup>

RP-HPLC:  $t_R = 13.6$  min, 97% purity, solvent A=H<sub>2</sub>O/TFA (99.925:0.0075, v/v), solvent B CH<sub>3</sub>CN/H<sub>2</sub>O/TFA (90:10:0.1 v/v/v) eluting gradient from 0% A /100% B to 60% A/40% B in 24 min, flow rate 1 mLmin<sup>-1</sup>, UV monitoring at 214 nm.

**Table S1.** <sup>1</sup>H NMR (500 MHz) chemical shifts ( $\delta$  / ppm) for **P<sup>HD'</sup>** in H<sub>2</sub>O/D<sub>2</sub>O v/v 9/1 at 278K, 3.2 mM, pH = 6.8. Signals assigned by COSY, TOCSY and ROESY 2D experiments.

| Residue               | HN   | H $\alpha$ | H $\beta$ | Others                                                                                                                                |
|-----------------------|------|------------|-----------|---------------------------------------------------------------------------------------------------------------------------------------|
| Ser(1)                | 8.43 | 4.38       | 3.8       | Ac: 2.02                                                                                                                              |
| Ed3a <sub>2</sub> (2) | 8.6  | 4.26       | 2.03, 1.9 | H $\gamma$ : 2.96, 2.8 (m, 2H), H $\delta$ , H $\epsilon$ : 3.24, 3.14 (m, 2H), H $\zeta$ , N $\eta$ CH <sub>2</sub> COOH : 3.94, 3.8 |
| Gly(3)                | 8.9  | 4.03       |           |                                                                                                                                       |
| Trp(4)                | 8.5  | 4.56       | 3.2       | H $\epsilon_1$ : 10.16, H $\epsilon_2$ : 7.55, H $\zeta_2$ : 7.44, H $\delta$ : 7.26, H $\zeta_1$ : 7.10                              |
| Ada <sub>2</sub> (5)  | 8.3  | 4.14       | 1.8, 1.17 | H $\gamma$ : 2.94, 2.49                                                                                                               |
| Ala(6)                | 7.95 | 3.89       | 1.23      | CONH <sub>2</sub> : 7.3, 7                                                                                                            |
| other                 |      |            |           | Ed3a <sub>2</sub> (2) and Ada <sub>2</sub> (5) N $\delta$ CH <sub>2</sub> COOH overlap : 3.5 (m, 6H)                                  |

## Tb<sup>3+</sup> complexes

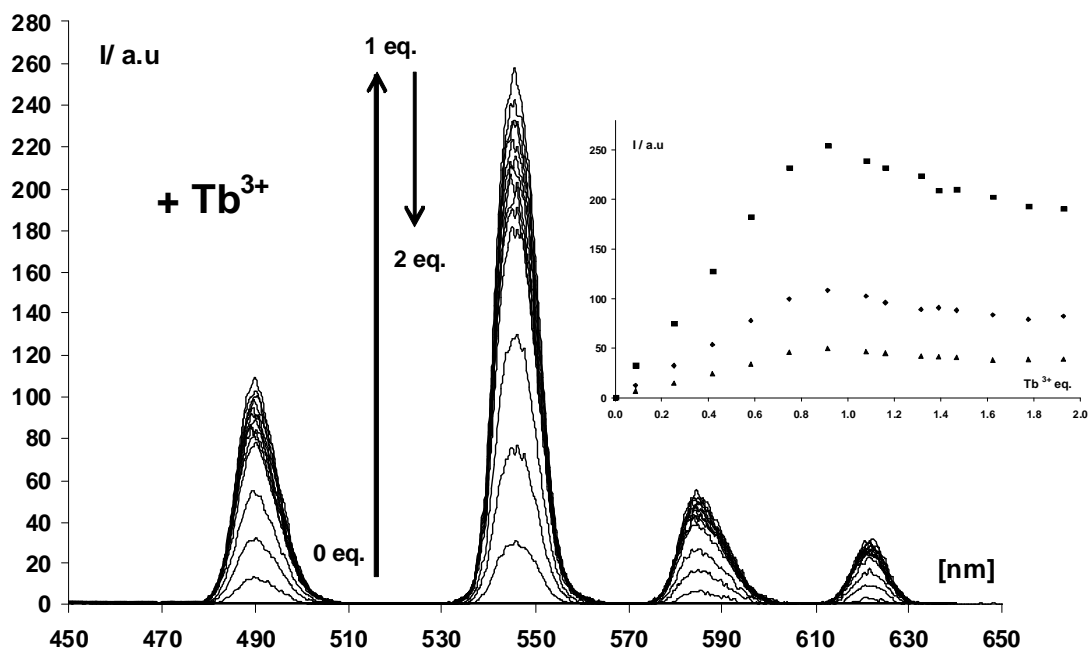

**Figure S1.** Tb-centered emission during the titration of  $P^{HD'}$  (54  $\mu$ M) with  $TbCl_3$  in HEPES buffer (10 mM, pH 7, 0.1 M KCl). Inset: Variation of the intensities of the peak maxima with Tb ( $\blacklozenge$ : 490nm  $\blacksquare$ : 545nm  $\blacktriangle$ : 587 nm)

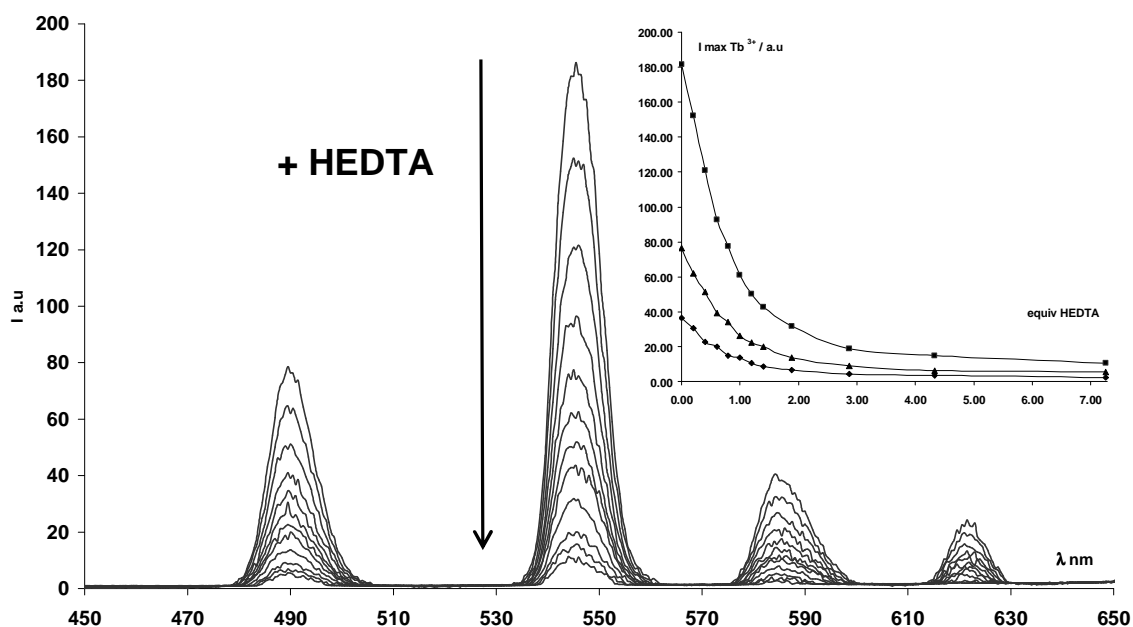

**Figure S2.** Disappearance of the Tb-centered emission during the titration of  $TbP^{HD'}$  (28  $\mu$ M) with HEDTA in HEPES buffer (10 mM, 0.1M KCl, pH 7). Inset: Variation of the intensities of the peak maxima ( $\blacktriangle$ :490nm  $\blacksquare$ :545nm  $\blacklozenge$ : 587 nm).

**Table S1.** Comparison of the properties of the three high density peptides.

| Complex                | $\tau_{H_2O}$ (ms) <sup>a)</sup> | $\tau_{D_2O}$ (ms) <sup>a)</sup> | $q$ <sup>b)</sup> | $\log\beta_{11}^{pH=7}$ <sup>c)</sup> | $\log\beta_{110}$ <sup>d)</sup> | Polymetallic complexes |
|------------------------|----------------------------------|----------------------------------|-------------------|---------------------------------------|---------------------------------|------------------------|
| TbP <sup>HD2</sup> [2] | 2.35(2)                          | 2.86(2)                          | 0.08(3)           | 12.7(5)                               | 16.2(5)                         | no                     |
| TbP <sup>HD5</sup> [2] | 2.30(2)                          | 2.81(2)                          | 0.09(3)           | 12.7(5)                               | 16.2(5)                         | yes                    |
| TbP <sup>HD'</sup>     | 1.94(2)                          | 2.88(2)                          | 0.5(3)            | 11.9(4)                               | 15.4(4)                         | yes                    |

<sup>a)</sup>  $\tau_{H_2O}$  and  $\tau_{D_2O}$  are the luminescence lifetimes of Tb<sup>3+</sup> in the complexes in HEPES buffer (10 mM, KCl 0.1 M, pH = 7.0) in 100% H<sub>2</sub>O and extrapolated to 100% D<sub>2</sub>O, respectively. <sup>b)</sup>  $q$  is the hydration number calculated from the lifetimes with Parker's equation.<sup>34</sup> <sup>c)</sup>  $\beta_{11}^{pH=7}$  is the conditional stability constant of TbP<sup>HD</sup> at pH 7, 298 K in 0.1 M KCl measured during the competition with HEDTA. <sup>d)</sup>  $\beta_{110}$  is the global stability constant of TbP<sup>HD</sup> calculated from  $\beta_{11}^{pH=7}$  and the peptide pKas.

## References

- [1] F. Cisnetti, C. Gateau, C. Lebrun, P. Delangle, *Chem. Eur. J.* 15 (2009) 7456.
- [2] A. Niedźwiecka, F. Cisnetti, C. Lebrun, P. Delangle, *Inorg. Chem.* 51 (2012) 5458.
- [3] A. Niedźwiecka, F. Cisnetti, C. Lebrun, C. Gateau, P. Delangle, *Dalton Trans.* 41 (2012) 3239.
